# Supplementary material
Source: publisher figshare collection journal article supplement (https://karger.figshare.com/ndownloader/files/28409520)
Supplement: Supplementary file 1 [file 28409520]

Table 1S. Diagnosis of patients with neuromuscular disorders.

| **Neuromuscular disorders** | 32 (49%)* |
| --- | --- |
| Amyotrophic lateral sclerosis | 9 (28%)§ |
| Duchenne muscular dystrophy | 3 (9%)§ |
| Myotonic dystrophy (Steinert) | 3 (9%)§ |
| Post traumatic tetraplegia | 2 (6%)§ |
| Nemaline myopathy | 2 (6%)§ |
| Diaphragmatic paralysis | 2 (6%)§ |
| Multiple sclerosis | 2 (6%)§ |
| Spinal muscular atrophy (SMA) | 2 (6%)§ |
| Inclusion myositis | 2 (6%)§ |
| Neurodegenerative disorders | 2 (6%)§ |
| Post-polio syndrome | 3 (9%)§ |

Values expressed as frequency (%); *: percentage of total patients included (n=66); §: percentage of patients with neuromuscular disorders
